# Supplementary material for: HSP90 inhibition induces selective destabilization of HDAC6 in a subset of tumor cell types
Source: Research Square preprint supplement (doi:10.21203/rs.3.rs-7155742/v1), 2025-07-29
Supplement: Supplementary file 1 [file 9d0be93b10eeabe49e0531bb.pdf]

Supplementary material

**HSP90 inhibition induces selective destabilization of HDAC6 in a subset of tumor cell types**

Zora Novakova\*, Miroslava Vosahlikova, Ruzena Tuckova, Barbora Havlinova, and Cyril Barinka\*

Laboratory of Structural Biology, Institute of Biotechnology of the Czech Academy of Sciences, Vestec,  
Czech Republic

Corresponding authors\*: Cyril Barinka [cyril.barinka@ibt.cas.cz](mailto:cyril.barinka@ibt.cas.cz), and Zora Novakova  
[zora.novakova@ibt.cas.cz](mailto:zora.novakova@ibt.cas.cz)

Table S1. List of antibodies used in the study

Table S2. List of primers utilized in quantitative RT-PCR

Figure S1. Specificity of anti-HDAC6 mouse monoclonal antibody Ab 159

Figure S2. Protein level of Akt2 and Akt3 upon HSP90 inhibition

Figure S3. Evaluation of antibody specificity

Figure S4. Uncropped western blots shown in Figure 1

Figure S5. Uncropped western blots shown in Figure 2

Figure S6. Uncropped western blots shown in Figure 3

Figure S7. Uncropped western blots shown in Figure 4

Table S1. List of antibodies used in the study

| Antibody                                               | Producer                 | Final concentration |
|--------------------------------------------------------|--------------------------|---------------------|
| anti-HDAC1 rabbit monoclonal antibody (D5C6U)          | Cell Signaling 34589     | 4 ng/mL             |
| anti-HDAC2 rabbit monoclonal antibody (D6S5P)          | Cell Signaling 57156     | 50 ng/ml            |
| anti-HDAC3 rabbit monoclonal antibody (D2O1K)          | Cell Signaling 85057T    | 50 ng/ml            |
| anti-HDAC4 rabbit monoclonal antibody (D8T3Q)          | Cell Signaling 15164     | 160 ng/mL           |
| anti-HDAC5 rabbit monoclonal antibody (D1J7V)          | Cell Signaling 20458     | 230 ng/mL           |
| anti-HDAC6 mouse monoclonal antibody (159)             | inhouse, clone 159/17/45 | 250 ng/mL           |
| anti-HDAC6 rabbit monoclonal antibody (D21B10)         | Cell Signaling 7612      | 90 ng/mL            |
| anti-HDAC7 rabbit monoclonal antibody (D4E1L)          | Cell Signaling 33418     | 902 ng/mL           |
| anti-HDAC8 rabbit monoclonal antibody (E7F5K)          | Cell Signaling 66042     | 75 ng/mL            |
| anti-HDAC9 rabbit monoclonal antibody (EPR5223)        | Abcam ab109446           | 550 ng/mL           |
| anti-HDAC10 rabbit polyclonal antibody                 | Abcam ab18971            | 100 ng/mL           |
| anti-HDAC10 rabbit polyclonal antibody                 | Sigma H3413              | 500 ng/mL           |
| anti-HDAC11 rabbit monoclonal antibody (D5I8E)         | Cell Signaling 58442     | 40 ng/mL            |
| anti-HDAC11 rabbit polyclonal antibody                 | GeneTex GTX116403        | 620 ng/mL           |
| anti-HDAC11 rabbit polyclonal antibody                 | Abcam ab18973            | 100 ng/mL           |
| anti-c-Raf rabbit polyclonal antibody                  | Cell Signaling 9422      | 10 ng/mL            |
| anti-Akt pan rabbit monoclonal antibody (C67E7)        | Cell Signaling 4691      | 20 ng/mL            |
| anti-Akt1 rabbit monoclonal antibody (C73H10)          | Cell Signaling 2937      | 20 ng/mL            |
| anti-Akt2 mouse monoclonal natibody (L79B2)            | Cell Signaling 5239      | 700 ng/mL           |
| anti-Akt3 rabbit monoclonal antibody (62A8)            | Cell Signaling 3788      | 50 ng/mL            |
| anti-HSP90 $\alpha$ rabbit monoclonal antibody (D1A7)  | Cell Signaling 8165      | 25 ng/mL            |
| anti-HSP90 $\beta$ rabbit monoclonal antibody (D3F2)   | Cell Signaling 7411      | *dilution 2000x     |
| anti-acetyl-tubulin $\alpha$ mouse monoclonal antibody | Sigma T7451              | 200 ng/mL           |
| anti-tubulin alpha rabbit polyclonal antibody          | Abcam ab18251            | 100 ng/mL           |
| anti-GAPDH mouse monoclonal antibody                   | HyTest 5G4-6C5           | 100 ng/mL           |
| goat anti-rabbit IgG (H + L)-HRP conjugate             | Bio-Rad 1706515          | *dilution 10 000x   |
| goat anti-mouse IgG (H + L)-HRP conjugate              | Bio-Rad 1706516          | *dilution 10 000x   |

\* antibody concentration not specified by producer

Table S2. List of primers utilized in quantitative RT-PCR

| Protein name   | Gene name | Accession ID   | forward primer          | reverse primer           |
|----------------|-----------|----------------|-------------------------|--------------------------|
| HDAC1          | HDAC1     | NM_004964.3    | CGGGAGGCGAGCAAGATG      | AGTCATGCGGATTCGGTGAGG    |
| HDAC2          | HDAC2     | NM_001527.4    | CATGGCGTACAGTCAAGGAGG   | AGTTATGGGTCATGCGGATTCT   |
| HDAC3          | HDAC3     | NM_001355039.2 | GATTGGGCTGCTTTAACCTCA   | ACAGTATAACCACCACCACCC    |
| HDAC4          | HDAC4     | NM_006037.4    | CACGACCTGACCGCCATTT     | ACAGCGTTTGATTGGGTCT      |
| HDAC5          | HDAC5     | NM_005474.5    | TCTGTAGCCATCACCGCAAA    | GGGGTCATTGTAGAACGCCTG    |
| HDAC6          | HDAC6     | NM_001321231.2 | CACTGGCTTGGTGTGGATG     | GGCCTGAAAGGACACGCAG      |
| HDAC7          | HDAC7     | NM_015401.5    | CAGAAACCCAACTCAATGCC    | ACTTCTTCTTTGTGAGCCCT     |
| HDAC8          | HDAC8     | NM_018486.3    | TGTCAGTATGTGTGACTCCCTG  | GCATCAGTGTGGAAGGTGG      |
| HDAC9          | HDAC9     | NM_001204146.2 | TTGGAGAAGCAGAAGCAATACC  | TCAAGGTGACTGCCTGGTTG     |
| HDAC10         | HDAC10    | NM_001159286.2 | TCTACTTCCACCCGAGTACCTT  | ATTTTGCACAGCTCCAGTGA     |
| HDAC11         | HDAC11    | NM_001330636.2 | ACCGCCACATCTACCCAG      | TGTTCTCTCCACCTTATCCA     |
| Akt1           | AKT1      | NM_001014431.2 | CGTGGCTATTGTGAAGGAGGG   | ATTCTTGAGGAGGAAGTAGCGT   |
| c-Raf          | RAF1      | NM_001354695.3 | GCAGACGGCTCAGGGAATG     | CCACTCCAGCGTGACTTTACT    |
| HSP90 $\alpha$ | HSP90AA1  | NM_005348.4    | GAAACTGCGCTCCTGTCTTCT   | GTCATCTTCATCAATACCCAGACC |
| HSP90 $\beta$  | HSP90AB1  | NM_001271969.2 | TCCCTTTGACCTTTTGTAGAACA | ACCACACCACGGATAAAATTGAG  |

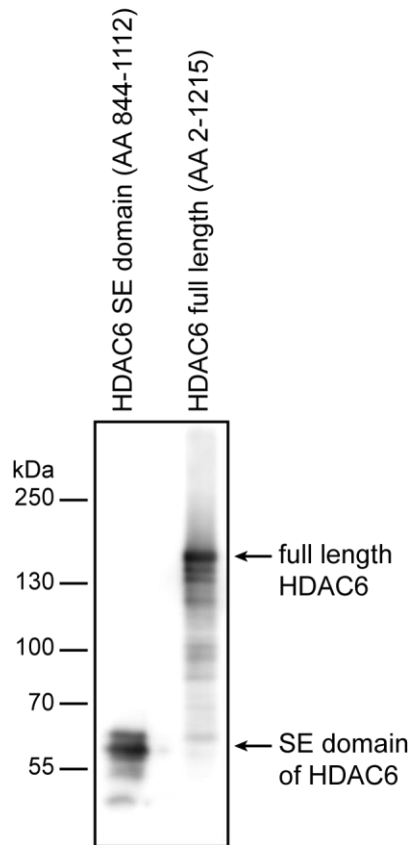

Figure S1. Specificity of anti-HDAC6 mouse monoclonal antibody Ab 159.  $\beta$ -mercaptoethanol-reduced samples of purified recombinant protein variants of HDAC6 were separated by SDS PAGE, and electroblotted on PVDF membrane that was further incubated in 5% milk/PBS/0.05% Tween-20 buffer for 45 min, and probed overnight with 1  $\mu$ g/mL anti-HDAC6 Ab 159 diluted in 2% milk/PBS/0.05% Tween-20 buffer. Specific signal was detected using HRP-conjugated anti-mouse IgG secondary antibody. Antibody Ab 159 specifically recognizes epitope in SE domain of HDAC6 and detects full length HDAC6 construct.

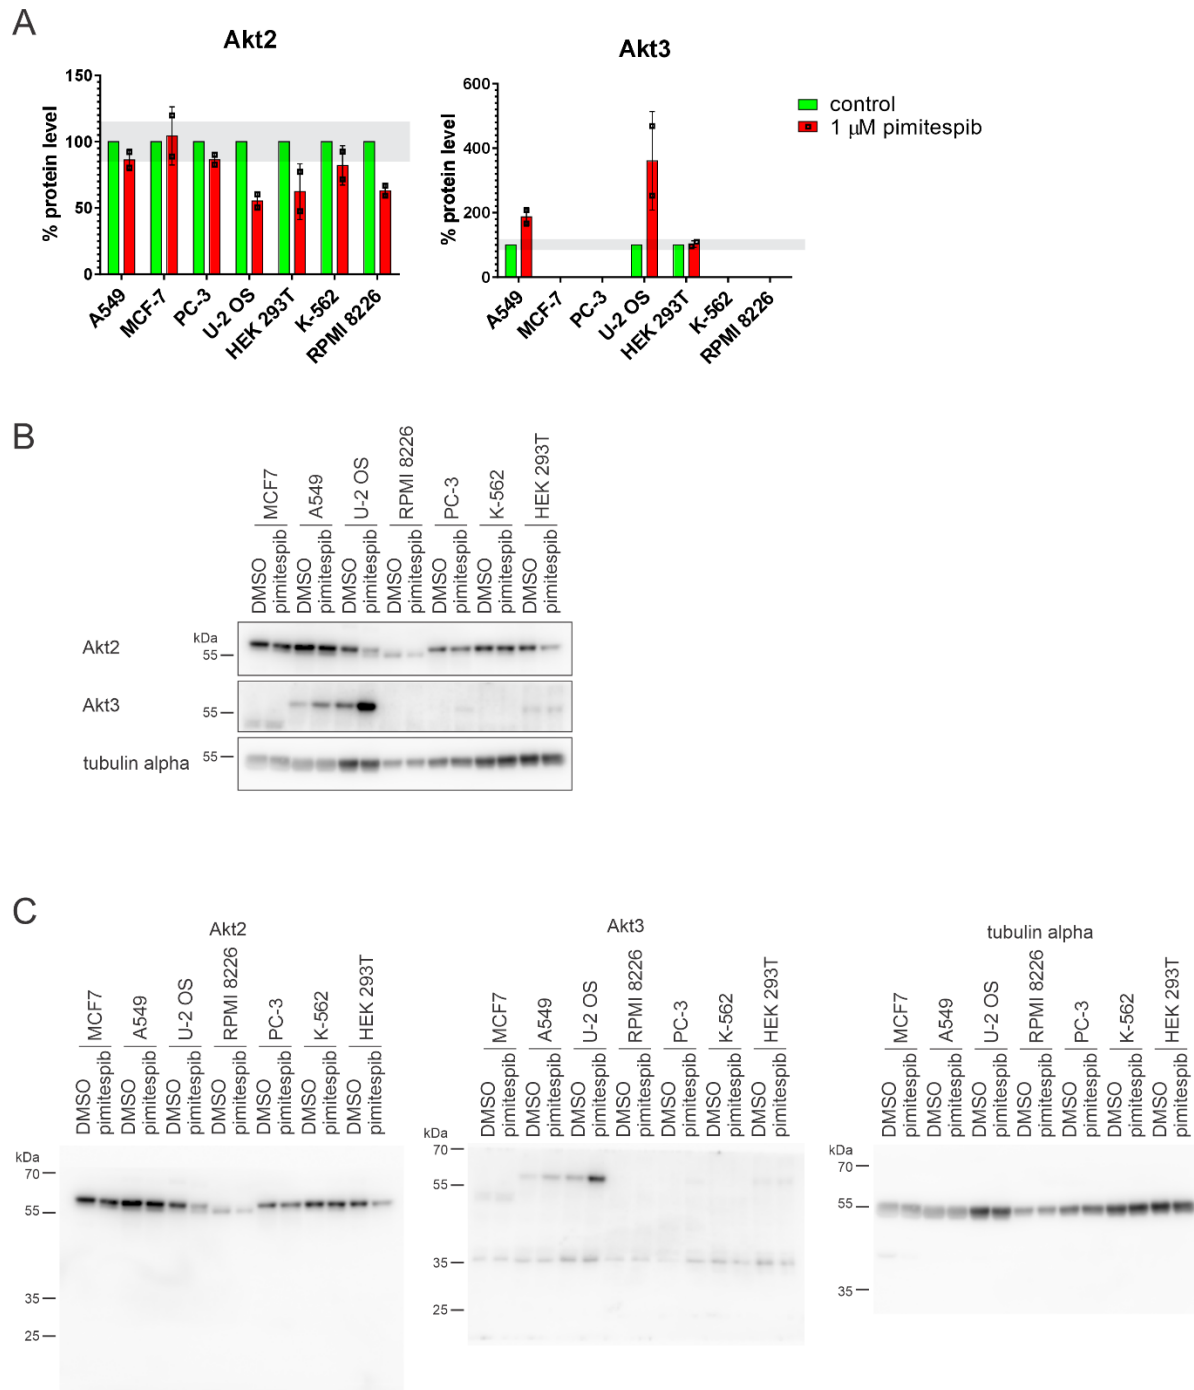

Figure S2. Protein level of Akt2 and Akt3 upon HSP90 inhibition. Cells were treated by 1  $\mu$ M pimitespi or 0.1% DMSO (control) for 24 hours. Isoforms of Akt were immunodetected in cell lysates transferred on western blot membrane. The quantification error of the chemiluminescence detection equal 15% is marked by grey area. (A) Data were normalized by tubulin alpha level, then protein levels upon pimitespi treatment were related to control samples of individual cell lines. (B) Representative images of individual proteins immunodetected on western blot. (C) Uncropped unprocessed images of western blots.

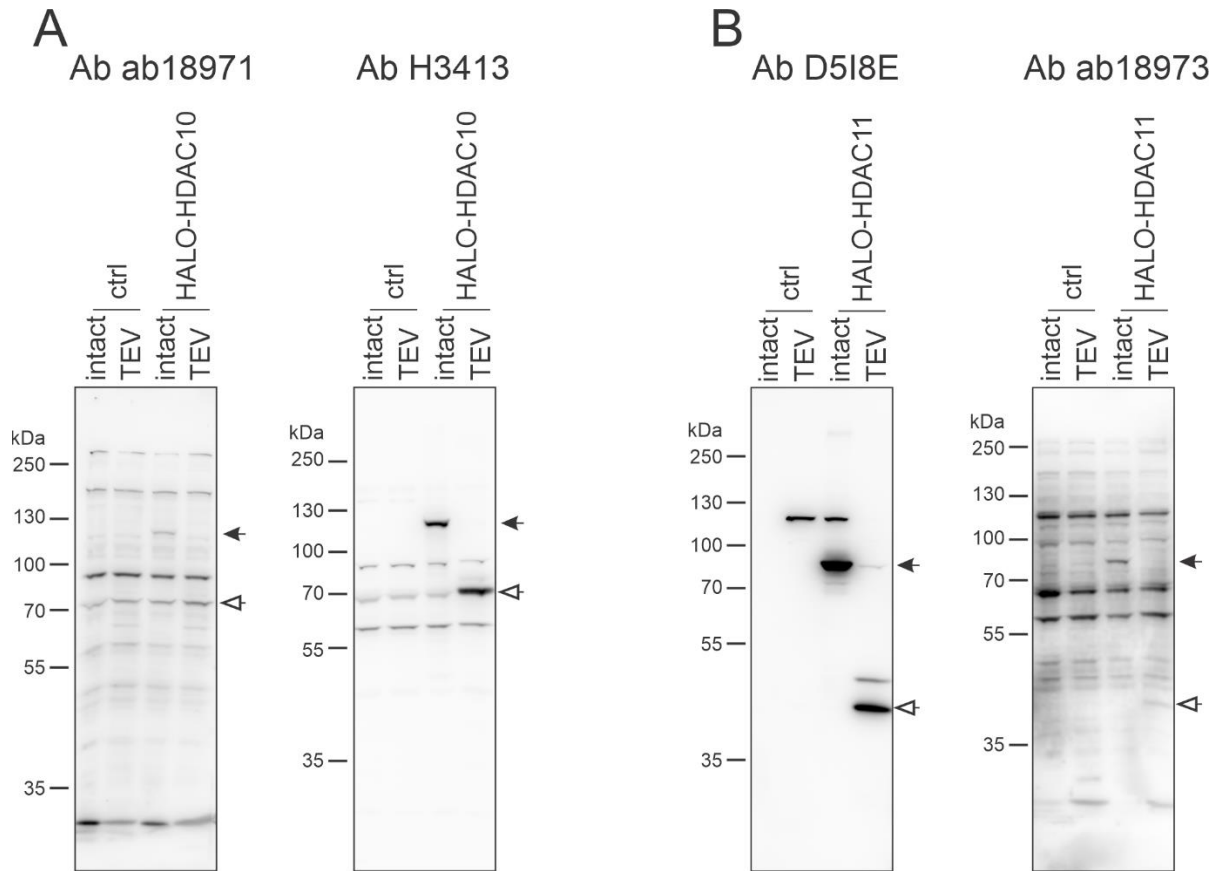

Figure S3. Evaluation of antibody specificity. Cells were transfected by constructs of HDAC10 and HDAC11 fused with HALO tag cleavable by TEV protease. Cell lysates were incubated with TEV, separated by SDS PAGE, and electroblotted onto membrane. HDACs were detected on membrane using antibodies from different sources. Samples without TEV treatment (intact) show signal of fusion construct (black arrow) while TEV-treated samples reveal signal of HDAC cleaved from fusion (white arrow). (A) Molecular weight of HALO-HDAC10 construct ~ 116 kDa, molecular weight of TEV-cleaved HDAC10 ~ 71 kDa. Both antibodies recognize human recombinant HDAC10. (B) Molecular weight of HALO-HDAC11 construct ~ 84 kDa, molecular weight of TEV-cleaved HDAC11 ~ 39 kDa. Both antibodies recognize human recombinant HDAC11.

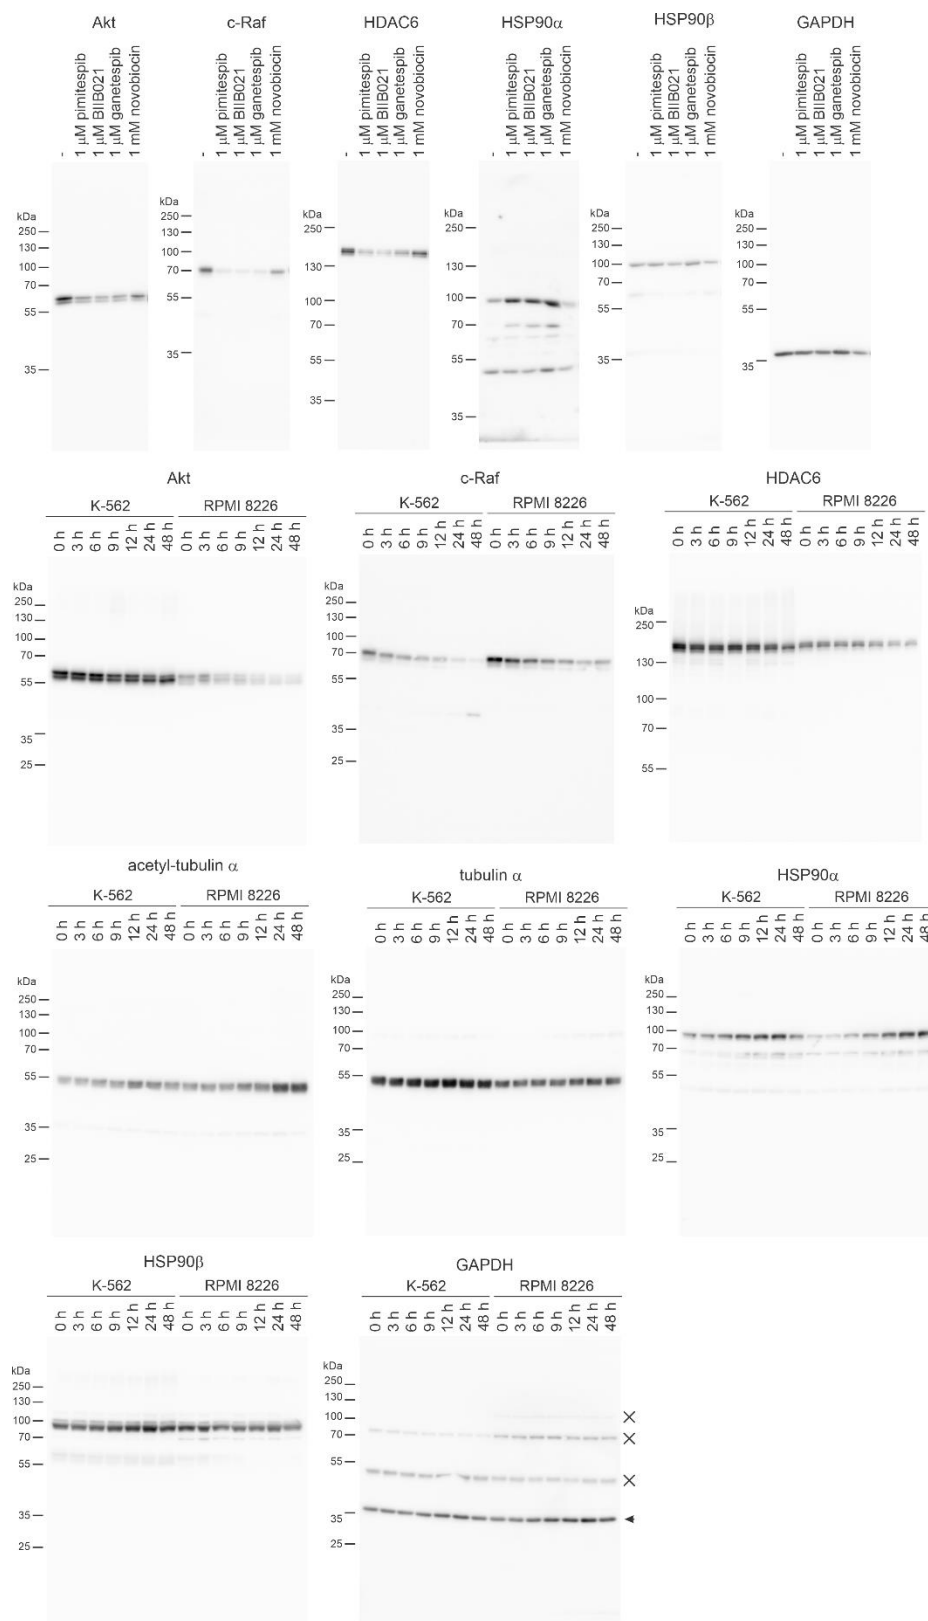

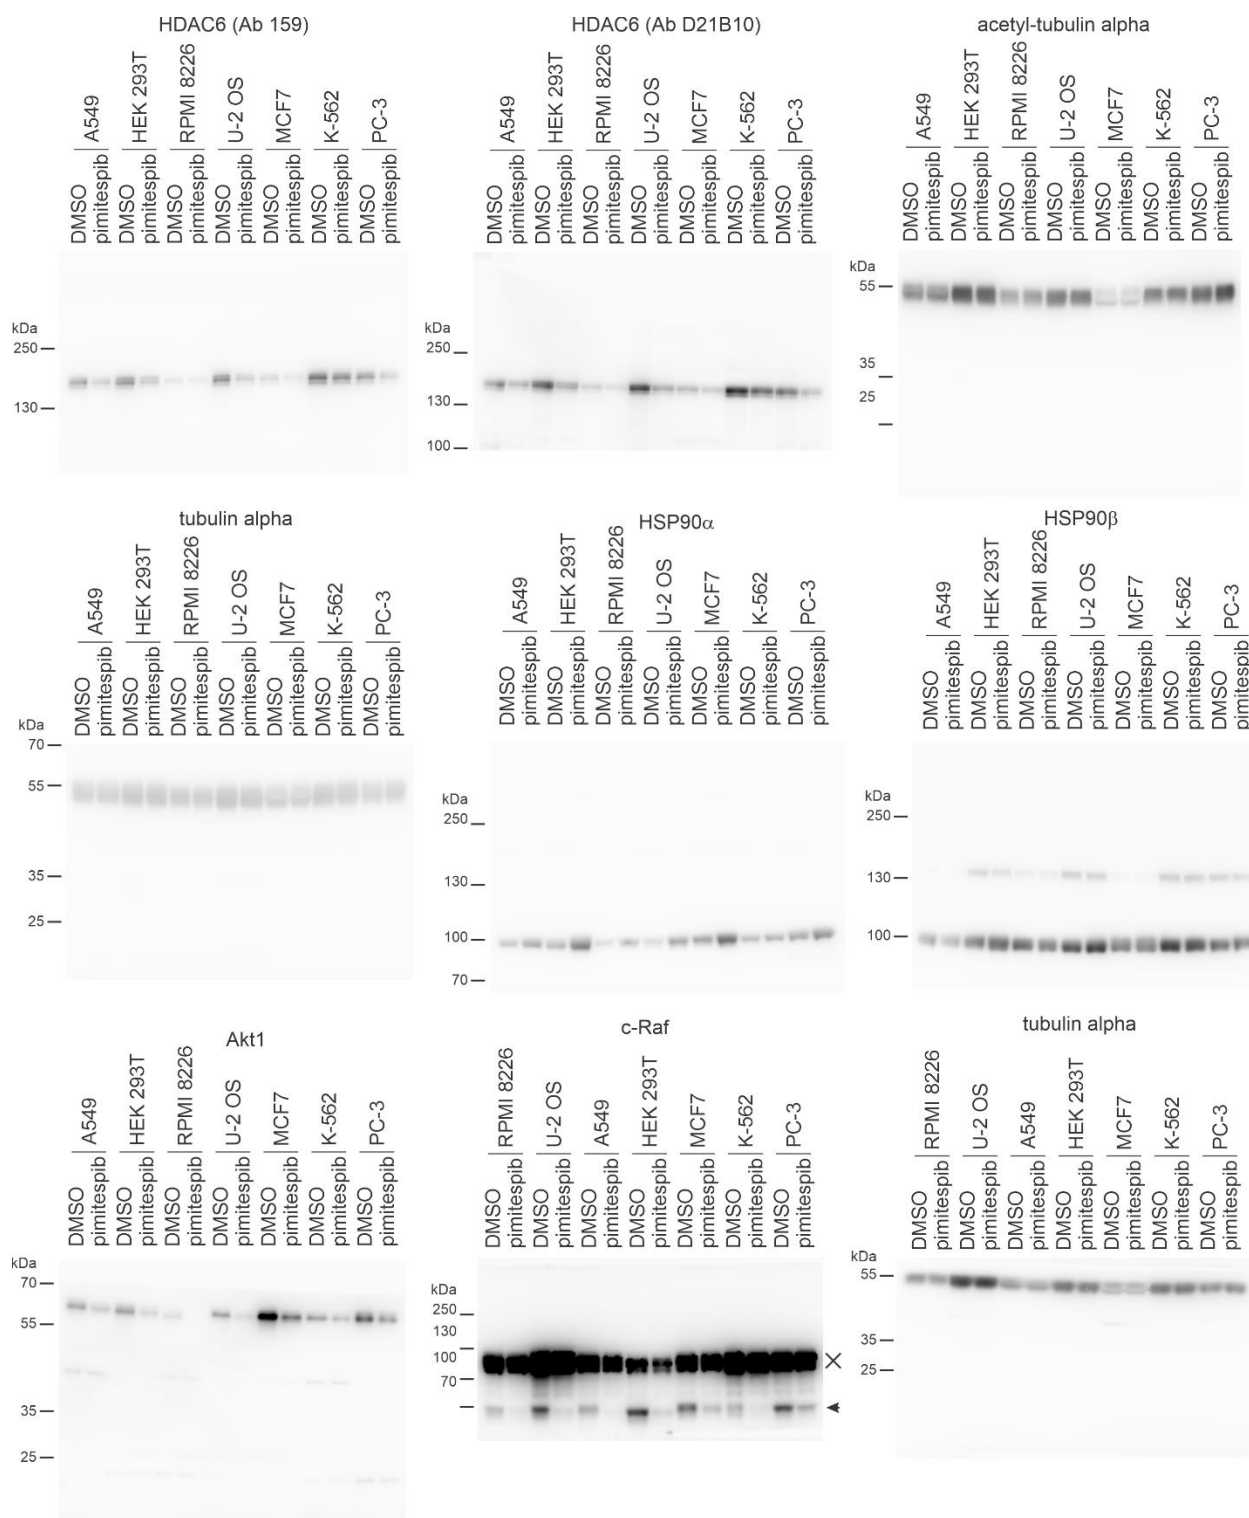

Figure S5. Uncropped unprocessed western blots shown in Figure 2. Position of detected antigen is marked by arrow while signals originated from the former detection of different antigen on the same membrane are marked by cross.



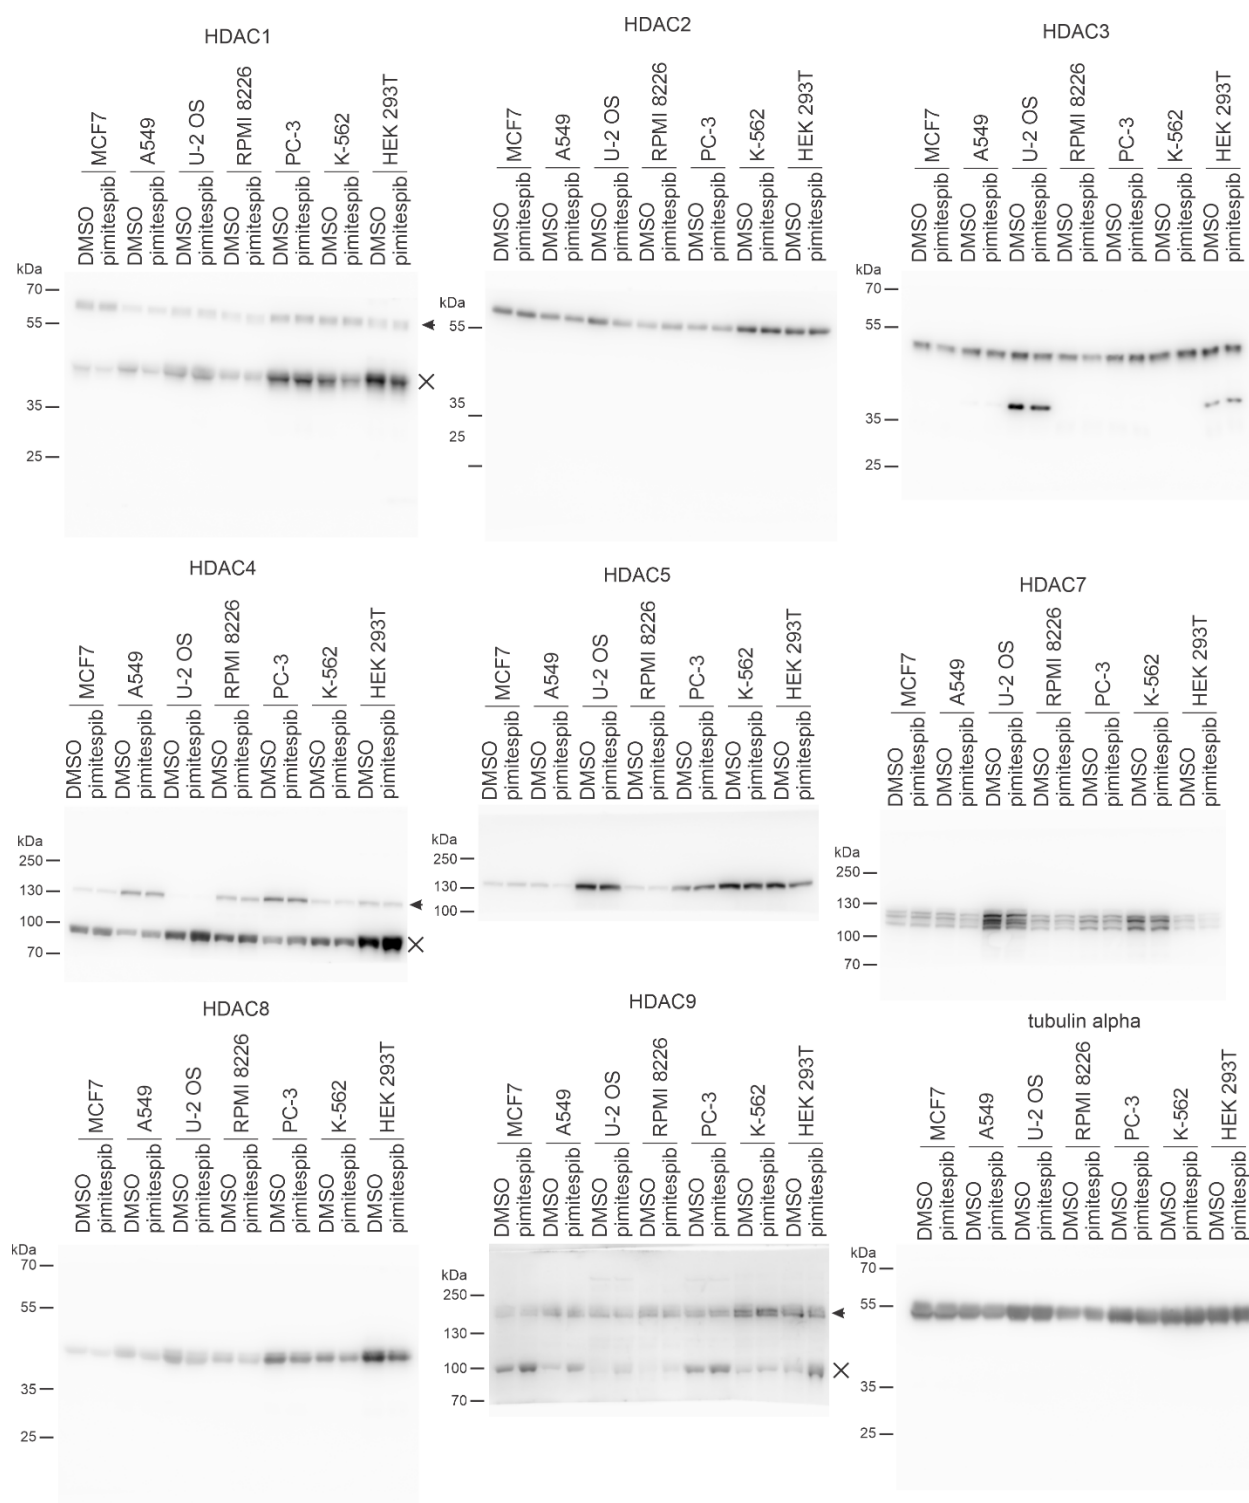

Figure S6. Uncropped unprocessed western blots shown in Figure 3. Position of detected antigen is marked by arrow while signals originated from the former detection of different antigen on the same membrane are marked by cross.

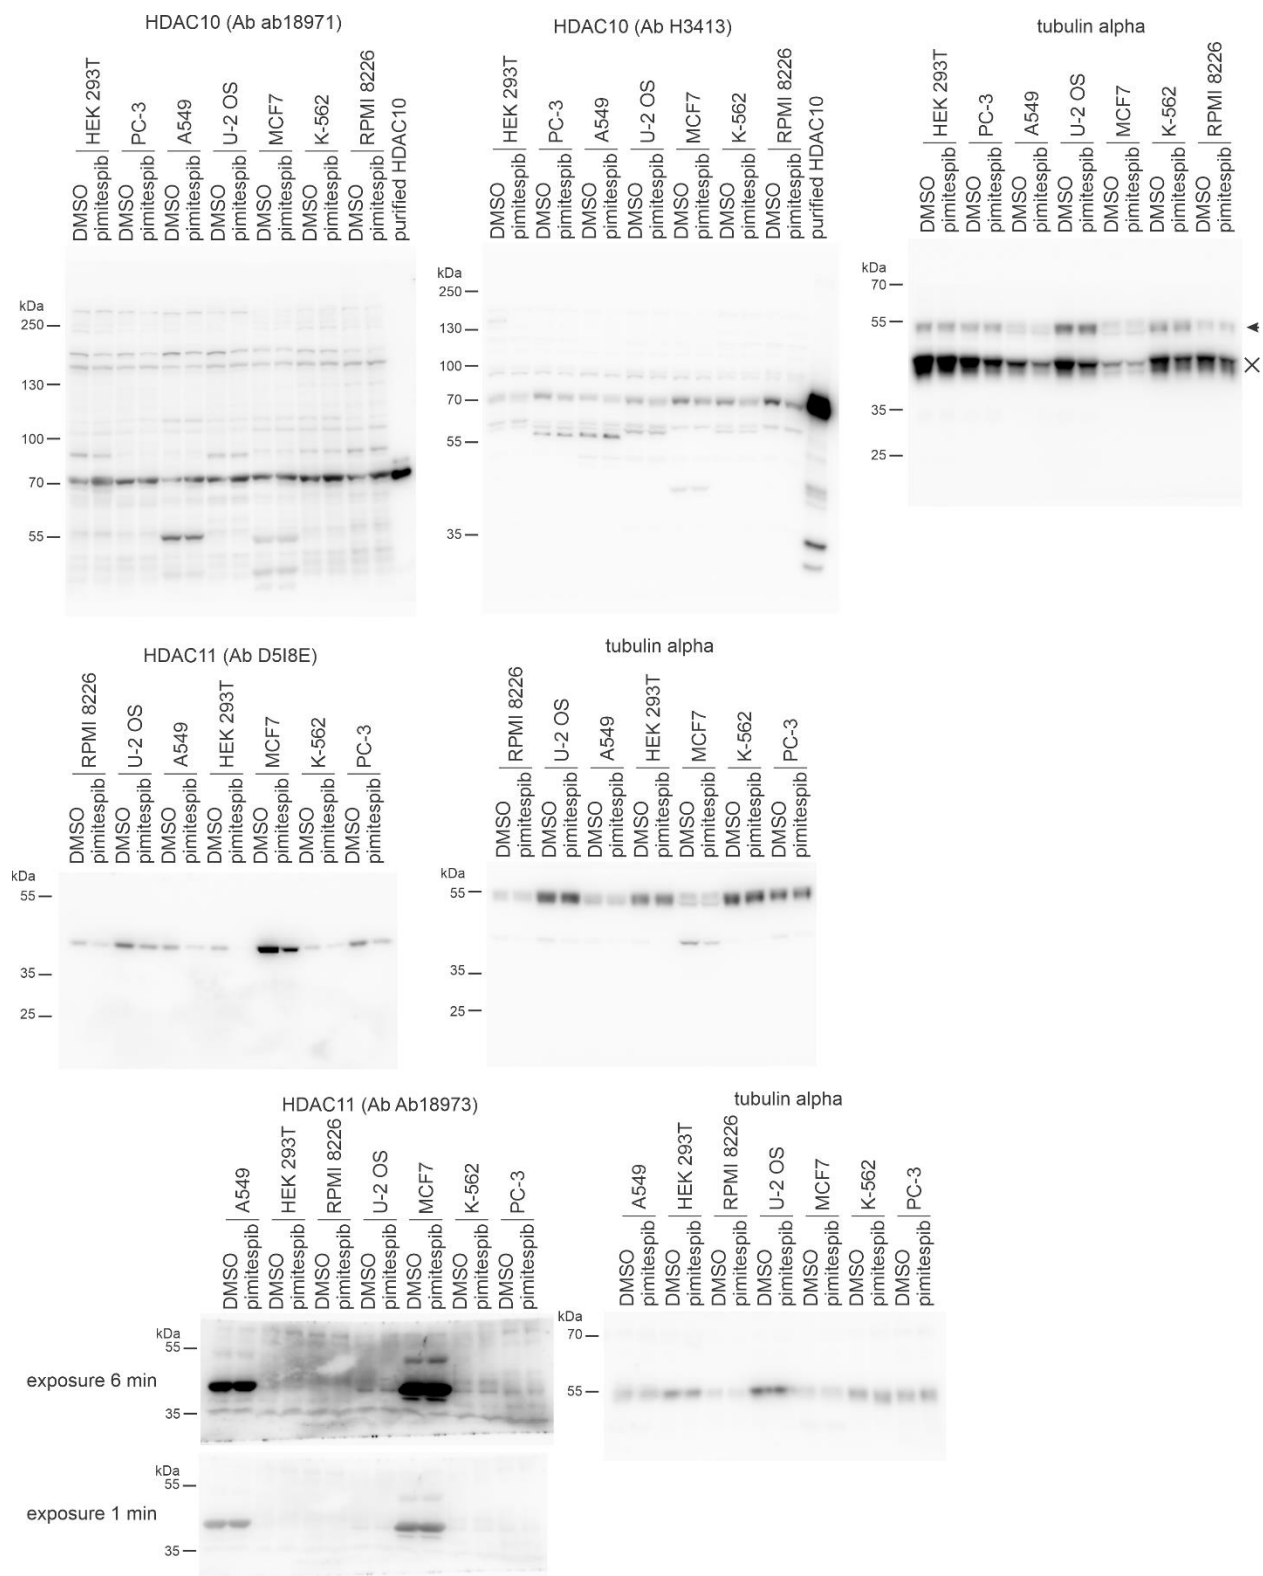

Figure S7. Uncropped unprocessed western blots shown in Figure 4. Position of detected antigen is marked by arrow while signals originated from the former detection of different antigen on the same membrane are marked by cross.
